# Supplementary material
Source: publisher site journal article supplement (https://www.dovepress.com/article/283204)
Supplement: Supplementary file 1 [file get_supplementary_file.php]

# Therapeutic options in unresectable oral squamous cell carcinoma: a systematic review

## Supplementary material 1. Search strategies

|                                        |                                                                                                                                                                                                                                                                                                                                                                                                                                                                                                                                                                                                                                                                                                                                                                                                                                                                                                                                                                                                                                                                                                                                                                                                                                                                                                                                                                                                                                                                                                                                                                                                                                                                                                                                                                                                                                                                                                                                                                                                                                                                                                                 |
|----------------------------------------|-----------------------------------------------------------------------------------------------------------------------------------------------------------------------------------------------------------------------------------------------------------------------------------------------------------------------------------------------------------------------------------------------------------------------------------------------------------------------------------------------------------------------------------------------------------------------------------------------------------------------------------------------------------------------------------------------------------------------------------------------------------------------------------------------------------------------------------------------------------------------------------------------------------------------------------------------------------------------------------------------------------------------------------------------------------------------------------------------------------------------------------------------------------------------------------------------------------------------------------------------------------------------------------------------------------------------------------------------------------------------------------------------------------------------------------------------------------------------------------------------------------------------------------------------------------------------------------------------------------------------------------------------------------------------------------------------------------------------------------------------------------------------------------------------------------------------------------------------------------------------------------------------------------------------------------------------------------------------------------------------------------------------------------------------------------------------------------------------------------------|
| <b>MEDLINE</b><br>PubMed<br>12/04/2021 | <p>#1 (((((((((((((((((((((((((((("Mouth Neoplasms"[Mesh] OR (oral carcinoma*[tiab] OR (oral[ti] AND carcinoma*[ti])) OR (oral cancer*[tiab] OR (oral[ti] AND cancer*[ti])) OR (oral tumor*[tiab] OR (oral[ti] AND tumor*[ti])) OR (oral tumour*[tiab] OR (oral[ti] AND tumour*[ti])) OR (oral neoplasm*[tiab] OR (oral[ti] AND neoplasm*[ti])) OR (oral oncolog*[tiab] OR (oral[ti] AND oncolog*[ti])) OR (oral malignan*[tiab] OR (oral[ti] AND malignan*[ti])) OR (mouth carcinoma*[tiab] OR (mouth[ti] AND carcinoma*[ti])) OR (mouth cancer*[tiab] OR (mouth[ti] AND cancer*[ti])) OR (mouth tumor*[tiab] OR (mouth[ti] AND tumor*[ti])) OR (mouth tumour*[tiab] OR (mouth[ti] AND tumour*[ti])) OR (mouth neoplasm*[tiab] OR (mouth[ti] AND neoplasm*[ti])) OR (mouth oncolog*[tiab] OR (mouth[ti] AND oncolog*[ti])) OR (mouth malignan*[tiab] OR (mouth[ti] AND malignan*[ti])) OR (buccal carcinoma*[tiab] OR (buccal[ti] AND carcinoma*[ti])) OR (buccal cancer*[tiab] OR (buccal[ti] AND cancer*[ti])) OR (buccal tumor*[tiab] OR (buccal[ti] AND tumor*[ti])) OR (buccal tumour*[tiab] OR (buccal[ti] AND tumour*[ti])) OR (buccal neoplasm*[tiab] OR (buccal[ti] AND neoplasm*[ti])) OR (buccal oncolog*[tiab] OR (buccal[ti] AND oncolog*[ti])) OR (buccal malignan*[tiab] OR (buccal[ti] AND malignan*[ti])) OR (oral cavity carcinoma*[tiab] OR (oral cavity[ti] AND carcinoma*[ti])) OR (oral cavity cancer*[tiab] OR (oral cavity[ti] AND cancer*[ti])) OR (oral cavity tumor*[tiab] OR (oral cavity[ti] AND tumor*[ti])) OR (oral cavity tumour*[tiab] OR (oral cavity[ti] AND tumour*[ti])) OR (oral cavity neoplasm*[tiab] OR (oral cavity[ti] AND neoplasm*[ti])) OR (oral cavity oncolog*[tiab] OR (oral cavity[ti] AND oncolog*[ti])) OR (oral cavity malignan*[tiab] OR (oral cavity[ti] AND malignan*[ti])) 90,682</p> <p>#2 (Unresectable[tiab] OR (Advanced[tiab] OR (Inoperable[tiab] 480,027</p> <p>#3 "Therapeutics"[Mesh] OR (Treatment*[tiab] OR (Management*[tiab] OR (Therap*[tiab] 9,862,814</p> <p>#4 #1 AND #2 AND #3 5,509</p> <p>#5 Filtered by last ten years 1896</p> |
|----------------------------------------|-----------------------------------------------------------------------------------------------------------------------------------------------------------------------------------------------------------------------------------------------------------------------------------------------------------------------------------------------------------------------------------------------------------------------------------------------------------------------------------------------------------------------------------------------------------------------------------------------------------------------------------------------------------------------------------------------------------------------------------------------------------------------------------------------------------------------------------------------------------------------------------------------------------------------------------------------------------------------------------------------------------------------------------------------------------------------------------------------------------------------------------------------------------------------------------------------------------------------------------------------------------------------------------------------------------------------------------------------------------------------------------------------------------------------------------------------------------------------------------------------------------------------------------------------------------------------------------------------------------------------------------------------------------------------------------------------------------------------------------------------------------------------------------------------------------------------------------------------------------------------------------------------------------------------------------------------------------------------------------------------------------------------------------------------------------------------------------------------------------------|

## Supplementary material 2. List of excluded studies and reasons for exclusion

### *Studies no specified for unresectable oral cancer (wrong population)*

1. Chen LA, Anker CJ, Hunt JP, Buchmann LO, Grossmann KF, Boucher K, Fang LM, Shrieve DC, Hitchcock YJ. Clinical outcomes associated with evolving treatment modalities and radiation techniques for base-of-tongue carcinoma: thirty years of institutional experience. *Cancer Med*. 2015 May;4(5):651-60. doi: 10.1002/cam4.364.
2. Hauswald H, Zwicker F, Rochet N, Jensen AD, Debus J, Lindel K. Treatment of squamous cell carcinoma of the mobile tongue or tongue margins: an interdisciplinary challenge. *Acta Oncol*. 2013 Jun;52(5):1017-21. doi: 10.3109/0284186X.2012.722678.
3. Hoffmann C, Calugaru V, Borcoman E, Moreno V, Calvo E, Liem X, Salas S, Doger B, Jouffroy T, Mirabel X, Rodriguez J, Chilles A, Bernois K, Dimitriu M, Fakhry N, Hee Kam SW, Le Tourneau C. Phase I dose-escalation study of NBTXR3 activated by intensity-modulated radiation therapy in elderly patients with locally advanced squamous cell carcinoma of the oral cavity or oropharynx. *Eur J Cancer*. 2021 Mar;146:135-144. doi: 10.1016/j.ejca.2021.01.007.
4. Kartini D, Taher A, Panigoro SS, Setiabudy R, Jusman SW, Haryana SM, Abdullah M, Rustamadji P, Purwanto DJ, Sutandyo N, Suroyo I, Siregar BH, Maruli H, Sungkar S. Effect of melatonin supplementation in combination with neoadjuvant chemotherapy to miR-210 and CD44 expression and clinical response improvement in locally advanced oral squamous cell carcinoma: a randomized controlled trial. *J Egypt Natl Canc Inst*. 2020 Feb 28;32(1):12. doi: 10.1186/s43046-020-0021-0.
5. Kotsuma T, Yamazaki H, Masui K, Yoshida K, Shimizutani K, Akiyama H, Murakami S, Isohashi F, Yoshioka Y, Ogawa K, Tanaka E. Brachytherapy for Buccal Cancer: From Conventional Low Dose Rate (LDR) or Mold Technique to High Dose Rate Interstitial Brachytherapy (HDR-ISBT). *Anticancer Res*. 2017 Dec;37(12):6887-6892. doi: 10.21873/anticancer.12151.
6. Lambert A, Nees L, Nuyts S, Clement P, Meulemans J, Delaere P, Vander Poorten V. Photodynamic Therapy as an Alternative Therapeutic Tool in Functionally Inoperable Oral and Oropharyngeal Carcinoma: A Single Tertiary Center Retrospective Cohort Analysis. *Front Oncol*. 2021 Mar 4;11:626394. doi: 10.3389/fonc.2021.626394.
7. León X, García J, López M, Farré N, Majercakova K, Gallego Ó, López-Pousa A, Quer M. Organ preservation after treatment with induction chemotherapy in patients with locally advanced carcinomas (T3-T4) of oral cavity and oropharynx. *Acta Otorrinolaringol Esp (Engl Ed)*. 2021 Jan-Feb;72(1):27-36. English, Spanish. doi: 10.1016/j.otorri.2020.01.001.
8. Maggiore RJ, Curran EK, Witt ME, Haraf DJ, Vokes EE, Cohen EE. Survival and selected outcomes of older adults with locally advanced head/neck cancer treated with chemoradiation therapy. *J Geriatr Oncol*. 2013 Oct;4(4):327-33. doi: 10.1016/j.jgo.2013.05.003.
9. Meng J, Wang X, Zhuang QW, Gu QP, Zhang J, Li ZP. Clinical effectiveness of 125I-seed implantation in combination with nimotuzumab therapy for the advanced oral carcinoma: preliminary results. *Eur Rev Med Pharmacol Sci*. 2014;18(21):3304-10.
10. Mitsudo K, Koizumi T, Iida M, Iwai T, Oguri S, Yamamoto N, Itoh Y, Kioi M, Hirota M, Tohnai I. Thermochemoradiation therapy using superselective intra-arterial infusion via superficial temporal and occipital arteries for oral cancer with N3 cervical lymph node metastases. *Int J Radiat Oncol Biol Phys*. 2012 Aug 1;83(5):e639-45. doi: 10.1016/j.ijrobp.2012.02.057.
11. Naruse T, Yanamoto S, Matsushita Y, Sakamoto Y, Morishita K, Ohba S, Shiraishi T, Yamada SI, Asahina I, Umeda M. Cetuximab for the treatment of locally advanced and recurrent/metastatic oral cancer: An investigation of distant metastasis. *Mol Clin Oncol*. 2016 Aug;5(2):246-252. doi: 10.3892/mco.2016.928.
12. Nguyen-Tan PF, Zhang Q, Ang KK, Weber RS, Rosenthal DI, Soulieres D, Kim H, Silverman C, Raben A, Galloway TJ, Fortin A, Gore E, Westra WH, Chung CH, Jordan RC, Gillison ML, List M, Le QT. Randomized phase III trial to test accelerated versus standard fractionation in combination with concurrent cisplatin for head and neck carcinomas in the Radiation Therapy Oncology Group 0129 trial: long-term report of efficacy and toxicity. *J Clin Oncol*. 2014 Dec 1;32(34):3858-66. doi: 10.1200/JCO.2014.55.3925.
13. Nozato T, Koizumi T, Hayashi Y, Iida M, Iwai T, Oguri S, Hirota M, Kioi M, Koike I, Hata M, Tohnai I, Mitsudo K. Thermochemoradiotherapy Using Superselective Intra-arterial Infusion for Patients With Oral Cancer With Cervical Lymph Node Metastases. *Anticancer Res*. 2019 Mar;39(3):1365-1373. doi: 10.21873/anticancer.

14. Patil VM, Noronha V, Joshi A, Muddu VK, Gulia S, Bhosale B, Arya S, Juvekar S, Chaturvedi P, Chaukar DA, Pai P, D'cruz A, Prabhash K. Induction chemotherapy in technically unresectable locally advanced oral cavity cancers: does it make a difference? *Indian J Cancer*. 2013 Jan-Mar;50(1):1-8. doi: 10.4103/0019-509X.112263. Erratum in: *Indian J Cancer*. 2013 Apr-Jun;50(2):153.
15. Patil V, Noronha V, D'cruz AK, Banavali SD, Prabhash K. Metronomic chemotherapy in advanced oral cancers. *J Cancer Res Ther*. 2012 Jan;8 Suppl 1:S106-10. doi: 10.4103/0973-1482.92223.
16. Roden DF, Schreiber D, Givi B. Triple-modality treatment in patients with advanced stage tonsil cancer. *Cancer*. 2017 Sep 1;123(17):3269-3276. doi: 10.1002/cncr.30728.
17. Sadighi S, Keyhani A, Harirchi I, Garajei A, Aghili M, Kazemian A, Motiee Langroudi M, Zendeheel K, Nikparto N. Neoadjuvant Chemotherapy for Locally Advanced Squamous Carcinoma of Oral Cavity: a Pilot Study. *Acta Med Iran*. 2015;53(6):380-6.
18. Saksø M, Jensen K, Andersen M, Hansen CR, Eriksen JG, Overgaard J. DAHANCA 28: A phase I/II feasibility study of hyperfractionated, accelerated radiotherapy with concomitant cisplatin and nimorazole (HART-CN) for patients with locally advanced, HPV/p16-negative squamous cell carcinoma of the oropharynx, hypopharynx, larynx and oral cavity. *Radiother Oncol*. 2020 Jul;148:65-72. doi: 10.1016/j.radonc.2020.03.025.
19. Sher DJ, Thotakura V, Balboni TA, Norris CM Jr, Haddad RI, Posner MR, Lorch J, Goguen LA, Annino DJ, Tishler RB. Treatment of oral cavity squamous cell carcinoma with adjuvant or definitive intensity-modulated radiation therapy. *Int J Radiat Oncol Biol Phys*. 2011 Nov 15;81(4):e215-22. doi: 10.1016/j.ijrobp.2011.02.023.
20. Tang X, Hu YJ, Ju WT, Fu Y, Sun WW, Liu Y, Tan YR, Wang LZ, Li J, Tu YY, Zhang CP, Zhang ZY, Zhong LP. Elevated growth differentiating factor 15 expression predicts long-term benefit of docetaxel, cisplatin and 5-fluorouracil induction chemotherapy in patients with oral cancer. *Oncol Lett*. 2018 May;15(5):8118-8124. doi: 10.3892/ol.2018.8324.
21. Tian Q, Zhu HH, Li H. Interstitial brachytherapy of oral squamous cell carcinoma with ultrasound-guided iodine-125 radioactive seed implantation. *Eur Rev Med Pharmacol Sci*. 2018 Mar;22(6):1680-1685. doi: 10.26355/eurev\_201803\_14580.

#### *Wrong intervention*

1. Oertel K, Spiegel K, Schmalenberg H, Dietz A, Maschmeyer G, Kuhnt T, Sudhoff H, Wendt TG, Guntinas-Lichius O. Phase I trial of split-dose induction docetaxel, cisplatin, and 5-fluorouracil (TPF) chemotherapy followed by curative surgery combined with postoperative radiotherapy in patients with locally advanced oral and oropharyngeal squamous cell cancer (TISOC-1). *BMC Cancer*. 2012 Oct 20;12:483. doi: 10.1186/1471-2407-12-483.
2. Patil VM, Chakraborty S, Shenoy PK, Manuprasad A, Sajith Babu TP, Shivkumar T, Babu S, Bhatteerjee A, Balasubramanian S. Tolerance and toxicity of neoadjuvant docetaxel, cisplatin and 5 fluorouracil regimen in technically unresectable oral cancer in resource limited rural based tertiary cancer center. *Indian J Cancer*. 2014 Jan-Mar;51(1):69-72. doi: 10.4103/0019-509X.134649.
3. Patil VM, Muttath G, Babu S, Kumar ST, Jones J, Sen S, Chakraborty S. Does the use of induction chemotherapy in oral cavity cancer compromise subsequent loco-regional treatment delivery: Results from a matched pair analysis. *Indian J Cancer*. 2015 Oct-Dec;52(4):632-6. doi: 10.4103/0019-509X.178442.
4. Rades D, Ulbricht T, Hakim SG, Schild SE. Cisplatin superior to carboplatin in adjuvant radiochemotherapy for locally advanced cancers of the oropharynx and oral cavity. *Strahlenther Onkol*. 2012 Jan;188(1):42-8. doi: 10.1007/s00066-011-0005-z.
5. Shin JY, Yoon JK, Shin AK, Diaz AZ. Locoregionally advanced oral cavity cancer: A propensity-score matched analysis on overall survival with emphasis on the impact of adjuvant radiotherapy. *Head Neck*. 2018 Sep;40(9):1934-1946. doi: 10.1002/hed.25185.
6. Sultania M, Deo SVS, Shukla NK, Sharma A, Sahoo R, Bhasker S. Low Cost, Low Dose, Oral, Neoadjuvant Chemotherapy Protocol in Locally Advanced Borderline Oral Cancers-Feasibility Study. *Indian J Surg Oncol*. 2021 Mar;12(1):67-72. doi: 10.1007/s13193-020-01247-8.
7. Veluthattil AC, Sudha SP, Kandasamy S, Chakkalakkoombil SV. Effect of Hypofractionated, Palliative Radiotherapy on Quality of Life in Late-Stage Oral Cavity Cancer: A Prospective Clinical Trial. *Indian J Palliat Care*. 2019 Jul-Sep;25(3):383-390. doi: 10.4103/IJPC.IJPC\_115\_18.

### *Wrong study design*

1. Furness S, Glenny AM, Worthington HV, Pavitt S, Oliver R, Clarkson JE, Macluskey M, Chan KK, Conway DI. Interventions for the treatment of oral cavity and oropharyngeal cancer: chemotherapy. *Cochrane Database Syst Rev.* 2011 Apr 13;(4):CD006386. doi: 10.1002/14651858
2. Kaul P, Singh MP, Pasricha R, Garg PK. Methotrexate based oral chemotherapy for advanced oral cancer during COVID-19 pandemic: Another option in the therapeutic armamentarium. *Oral Oncol.* 2020 Aug;107:104839. doi: 10.1016/j.oraloncology.2020.104839.
3. Rehman A, Allaudin Z, Nisar H, Khan IU, Fatima I, Shami A, Masood M, Shahid A. Efficacy and Toxicity of Concurrent Chemoradiation in Inoperable Oral Carcinoma in Pakistani Population. *J Coll Physicians Surg Pak.* 2017 Jun;27(6):342-347.

### *Other reasons*

1. Dequanter D, Shahla M, Aubert C, Deniz Y, Lothaire P. Chemoradiation for advanced oral and (pharyngo) laryngeal carcinoma: single institution outcome analysis. *Minerva Stomatol.* 2015 Jun;64(3):111-5.
2. Janmunee N, Peerawong T, Rordlamool P, Bridthikitti J, Tangthongkum M, Kongkamol C, Hirunpat S. Tumor volume as a prognostic factor on the median survival in locally advanced oral cancer treated with definitive chemoradiotherapy. *Indian J Cancer.* 2021 Jan 27. doi: 10.4103/ijc.IJC\_86\_20.
3. Noronha V, Patil V, Joshi A, Muddu V, Bhattacharjee A, Juvekar S, Arya S, Chaturvedi P, Chaukar D, Pai PS, Dcruz AK, Prabhash K. Is taxane/platinum/5 fluorouracil superior to taxane/platinum alone and does docetaxel trump paclitaxel in induction therapy for locally advanced oral cavity cancers? *Indian J Cancer.* 2015 Jan-Mar;52(1):70-3. doi: 10.4103/0019-509X.175604.
4. Vedesoundaram P, Prasanna AK, Ks R, Selvarajan G, Sinnatamby M, Ramapandian S, Kandasamy S. Role of high dose rate interstitial brachytherapy in early and locally advanced squamous cell carcinoma of buccal mucosa. *Springerplus.* 2014 Oct 9;3:590. doi: 10.1186/2193-1801-3-590.

**Supplementary material 3. Characteristics of the included studies**

| Author and year   | Design       | Country       | Language             | Sample size | Sample features                  | Risk factors                                                       |
|-------------------|--------------|---------------|----------------------|-------------|----------------------------------|--------------------------------------------------------------------|
| Bazyka 2019       | RCT          | Ukraine       | English<br>Ukrainian | 280         | Age: NR<br>F: NR<br>M: NR        | NR                                                                 |
| Biswas 2019       | P.<br>Cohort | India         | English              | 61          | Age: NR<br>F: NR<br>M: NR        | NR                                                                 |
| Chang 2017        | CT           | Taiwan        | English              | 43          | Age: 18-70 Y<br>F: 4<br>M: 39    | Alcohol 74%<br>Betel nut 72%<br>Smoking 79%                        |
| Chhatui 2015      | RCT          | India         | English              | 50          | Age: 19-65 Y<br>F: 11<br>M: 39   | NR                                                                 |
| Chitapanarux 2017 | R.<br>Cohort | Thailand      | English              | 775         | Age: 54-74 Y<br>F: 316<br>M: 459 | Alcohol 68%<br>Betel nut 28%<br>Smoking 81%                        |
| Donato 2013       | P.<br>Cohort | Italy         | English              | 24          | Age: 45-85 Y<br>F: 9<br>M: 15    | NR                                                                 |
| Elbers 2017       | R.<br>Cohort | Netherlands   | English              | 209         | Age: 62.0 Y<br>F: 72<br>M: 137   | Alcohol 42%<br>Smoking 53.6%                                       |
| Foster 2018       | R.<br>Cohort | United States | English              | 140         | Age: 27-80 Y<br>F: 44<br>M: 96   | NR                                                                 |
| Hayashi 2019      | R.<br>Cohort | Japan         | English              | 46          | Age: 39-85 Y<br>F: 25<br>M: 21   | Smoking 83%                                                        |
| Hino 2011         | RCT          | Japan         | English              | 16          | Age: 73.5 Y<br>F: 5<br>M: 11     | NR                                                                 |
| Iqbal 2015        | R.<br>Cohort | Pakistan      | English              | 63          | Age: 24-77 Y<br>F: 19<br>M: 44   | Alcohol 0%<br>Betel nut 46%<br>Smoking 43%<br>Tobacco chew 27%     |
| Larizadeh 2012    | P.<br>Cohort | Iran          | English              | 69          | Age: 27-87 Y<br>F: 29<br>M: 40   | NR                                                                 |
| Li 2014           | RCT          | China         | English              | 99          | Age: 57.1 Y<br>F: 38<br>M: 61    | NR                                                                 |
| Meng 2014         | RCT          | China         | English              | 17          | Age: 54-89 Y<br>F: 7<br>M: 10    | NR                                                                 |
| Murakami 2017     | P.<br>Cohort | Japan         | English              | 47          | Age: 45-91 Y<br>F: 23<br>M: 24   | NR                                                                 |
| Oyama 2020        | P.<br>Cohort | Japan         | English              | 37          | Age: 26-79 Y<br>F: 6<br>M: 31    | NR                                                                 |
| Patil 2014        | R.<br>Cohort | India         | English              | 721         | Age: 22-78 Y<br>F: 106<br>M: 615 | Alcohol 37.5%<br>Betel nut 81.5%<br>Smoking 53.8%<br>Tobacco 69.1% |

| Author and year    | Design    | Country       | Language | Sample size | Sample features                 | Risk factors                                                            |
|--------------------|-----------|---------------|----------|-------------|---------------------------------|-------------------------------------------------------------------------|
| Pederson 2011      | P. Cohort | United States | English  | 21          | Age: 34-81 Y<br>F: 4<br>M: 17   | Alcohol 95.2%<br>Smoking 76.2%                                          |
| Rewadkar 2017      | R. Cohort | India         | English  | 50          | Age: 20-70 Y<br>F: 13<br>M: 37  | Tobacco + alcohol 18%<br>Tobacco + chewing 34%<br>Tobacco + smoking 48% |
| Rudresha 2017a     | R. Cohort | India         | English  | 80          | Age: 34-62 Y<br>F: 22<br>M: 58  | Smoking 66.3%<br>Tobacco/betel 88.7%                                    |
| Rudresha 2017b     | R. Cohort | India         | English  | 116         | Age: 31-62 Y<br>F: 26<br>M: 90  | Smoking 53.4%<br>Tobacco/betel 92.2%                                    |
| Santos 2017        | R. Cohort | Spain         | English  | 24          | Age: 60.0 Y<br>F: 4<br>M: 20    | NR                                                                      |
| Sato 2019          | R. Cohort | Japan         | English  | 17          | Age: 44-87 Y<br>F: 3<br>M: 14   | NR                                                                      |
| Scher 2015         | R. Cohort | United States | English  | 73          | Age: 35-89 Y<br>F: 34<br>M: 39  | Smoking 90.4%                                                           |
| Shia 2020          | R. Cohort | Taiwan        | English  | 976         | Age: ≥70 Y<br>F: 159<br>M: 817  | Alcohol 70%<br>Betel nut 87.9%<br>Smoking 70.3%                         |
| Singh 2013         | RCT       | India         | English  | 60          | Age: 40-65 Y<br>F: 15<br>M: 45  | Tobacco 88.3%                                                           |
| Takácsi-Nagy 2013  | P. Cohort | Hungary       | English  | 60          | Age: 36-78 Y<br>F: 10<br>M: 50  | NR                                                                      |
| Takayama 2016      | CT        | Japan         | English  | 33          | Age: 25-69 Y<br>F: 11<br>M: 22  | NR                                                                      |
| Vedasoundaram 2020 | P. Cohort | India         | English  | 125         | Age: 32-73 Y<br>F: 48<br>M: 77  | Alcohol 16%<br>Alcohol + tobacco 12%<br>Tobacco + smoking 47.2%         |
| Wu 2014            | R. Cohort | Taiwan        | English  | 21          | Age: 39-75 Y<br>F: 2<br>M: 19   | NR                                                                      |
| Yen 2019           | CT        | Taiwan        | English  | 47          | Age: 34-66 Y<br>F: 1<br>M: 46   | NR                                                                      |
| Zaidi 2020         | CT        | Pakistan      | English  | 35          | Age: 18-65 Y<br>F: 11<br>M: 24  | NR                                                                      |
| Zhang 2013         | R. Cohort | Canada        | English  | 222         | Age: 16-95 Y<br>F: 88<br>M: 133 | NR                                                                      |

**Abbreviations:** CT, clinical trial; F, female; M, male; NR, not reported; P, prospective; R, retrospective; RCT, randomized controlled trial; Y, years.
